# Supplementary material
Source: Springer Nature journal article supplement (https://www.springermedizin.de/resource/supplementary/13058_2013_3448_MOESM1_ESM.pdf/9704034)
Supplement: MOESM1 [file 9704034]

# Supplementary Table 1S

## Clinical characteristics of cases included in the study

| <i>Reproductive categories</i> | <i>Number of cases</i> | <i>Av. Age</i> | <i>Av. Gravidity</i> | <i>Av. Parity</i> | <i>% of cases with breast cancer</i> |
|--------------------------------|------------------------|----------------|----------------------|-------------------|--------------------------------------|
| <i>Nulliparous</i>             | 23                     | 35.0           | 0                    | 0                 | 78.2                                 |
| <i>Pregnant</i>                | 16                     | 31.2           | 2                    | 1                 | 31.3                                 |
| <i>Lactation</i>               | 8                      | 36             | 2                    | 2                 | 0                                    |
| <i>Up to 1mo</i>               | 6                      | 33.8           | 2                    | 2                 | 100                                  |
| <i>&gt;1- ≤ 6m</i>             | 9                      | 32.3           | 2                    | 2                 | 44.5                                 |
| <i>&gt;6- ≤ 12m</i>            | 5                      | 28.0           | 3                    | 2                 | 100                                  |
| <i>&gt;12- ≤ 18m</i>           | 5                      | 37.0           | 3                    | 2                 | 100                                  |
| <i>&gt;18- ≤ 24m</i>           | 20                     | 36.7           | 2                    | 2                 | 95                                   |
| <i>&gt;2- ≤ 3y</i>             | 7                      | 34.1           | 3                    | 2                 | 100                                  |
| <i>&gt;3- ≤ 6y</i>             | 17                     | 35.5           | 3                    | 2                 | 100                                  |
| <i>&gt;6- ≤ 10y</i>            | 10                     | 39.2           | 3                    | 3                 | 100                                  |
| <i>&gt;10y</i>                 | 25                     | 39.7           | 5                    | 2                 | 96                                   |
